# Supplementary material for: Reaction pathways for the formation of Cu2ZnSn(Se,S)4 absorber materials from liquid-phase hydrazine-based precursor inks
Source: Royal Society of Chemistry journal article supplement (doi:10.1039/c2ee21529b), 2012-01-01
Supplement: c2ee21529b.pdf [file c2ee21529b.pdf]

# Reaction Pathways for the Formation of $\text{Cu}_2\text{ZnSn}(\text{Se,S})_4$ Absorber Materials from Liquid-Phase Hydrazine-based Precursor Inks

Wan-Ching Hsu <sup>a,b</sup>, Brion Bob <sup>a,b</sup>, Wenbing Yang <sup>a,b</sup>, Choong-Heui Chung <sup>a,b</sup>, Yang Yang <sup>a,b</sup>

<sup>a</sup> California NanoSystems Institute, 570 Westwood Plaza, Los Angeles, CA 90095, United States

<sup>b</sup> Department of Materials Science and Engineering, University of California Los Angeles, 410 Westwood Plaza, Los Angeles, CA 90095, United States

Tel (+)310-825-4052; E-mail: yangy@ucla.edu

## Electronic Supplementary Information

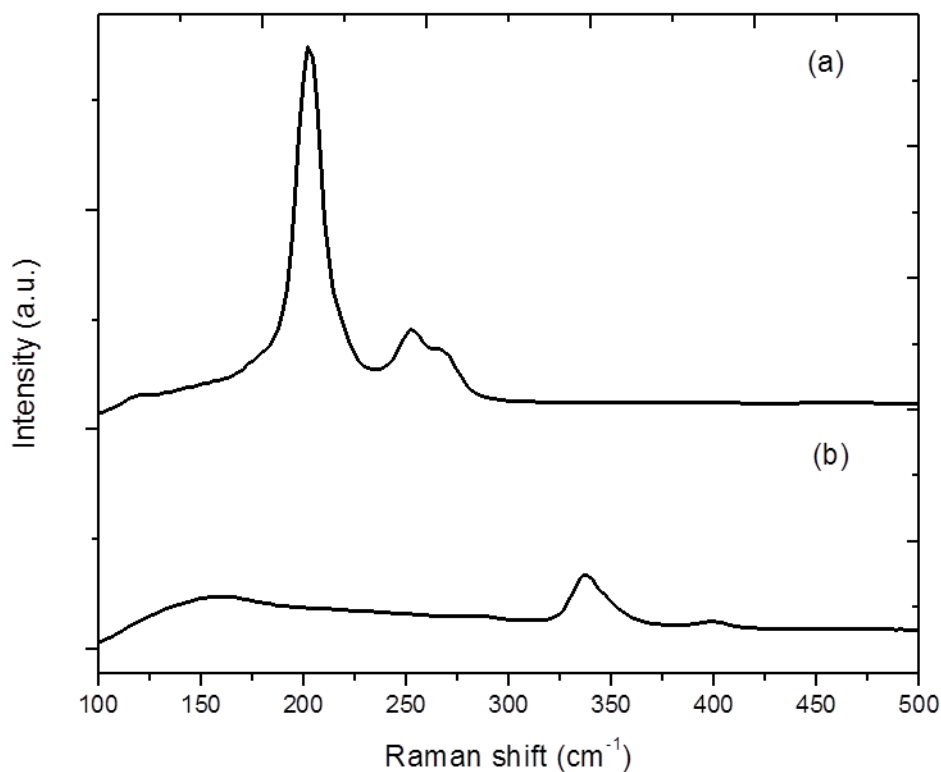

S. 1.

Raman spectra of (a)  $\text{SnSe}_2$ -Se solution with  $\text{SnSe}_2 : \text{Se} = 1 : 1$  and (b)  $\text{Cu}_2\text{S}$ -S solution with  $\text{Cu}_2\text{S} : \text{S} = 1 :$

2.

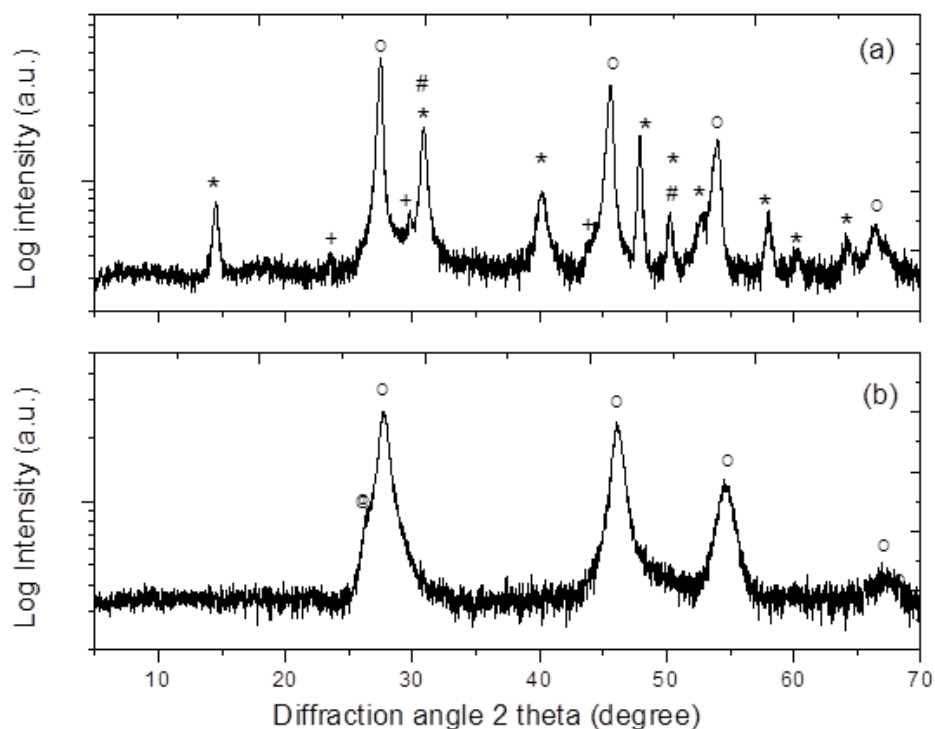

S. 2.

Powder XRD pattern of the powder prepared by (a) drying  $\text{Cu}_2\text{S-S}$  and  $\text{SnSe}_2\text{-Se}$  mixed solution annealing at  $200^\circ\text{C}$ , and (b) filtering and drying CZTSe precursor solution.  $\text{Cu}_2\text{Sn}(\text{Se,S})_3$  or kesterite is marked by “o” (reference code 01-089-2879);  $\text{SnSe}_2$  is marked by “\*” (reference code 00-023-0602);  $\text{CuSe}$  is marked by “#” (reference code 00-049-1457);  $\text{Se}$  is marked by “+” (reference code 00-042-1425); hexagonal  $\text{ZnX}$  is marked by “@”
